# Supplementary material for: Assessing the Effectiveness of Tuberculosis Management in Brushtail Possums (Trichosurus vulpecula), through Indirect Surveillance of Mycobacterium bovis Infection Using Released Sentinel Pigs
Source: PubMed Central journal article supplement (PMC3996883; doi:10.1155/2014/361634), 2014-04-02
Supplement: 361634.f1.pdf [file 361634.f1.pdf]

## Supporting supplementary information

*Scoring system used to classify severity of infection in head lymph nodes of individual pigs*

---

| Score | Appearance of the largest identifiable head-region lymph node lesion                                                    |
|-------|-------------------------------------------------------------------------------------------------------------------------|
| 0     | No visible lesions <u>and</u> culture negative submaxillary nodes, <u>or</u> (rarely), culture-negative lesioned tissue |
| 1     | No visible lesions, culture positive                                                                                    |
| 2     | Single or multiple small lesions <0.5 cm                                                                                |
| 3     | Single or multiple lesions 0.6–1.0 cm                                                                                   |
| 4     | Single or multiple lesions 1.1–2.0 cm                                                                                   |
| 5     | Single or multiple lesions 2.1–3.0 cm                                                                                   |
| 6     | Single or multiple lesions 3.1–4.0 cm                                                                                   |
| 7     | Single or multiple lesions >4.0 cm                                                                                      |

---
